# Supplementary material
Source: PubMed Central journal article supplement (PMC9435351)
Supplement: jcsm.10080.sm001.pdf [file jcsm.10080.sm001.pdf]

**Table S1. Associations between Frequency of Sleep Terrors in Early Childhood and Borderline-Clinical Degree of Emotional-Behavioral Problems in Preschool (total CBCL T-score of 60 and above)**

| Factors (unit or reference)                      | Odds ratio | p      |
|--------------------------------------------------|------------|--------|
| Child's sex (male)                               | 0.91       | 0.797  |
| Time (months)                                    | 1.09       | 0.749  |
| Socioeconomic status (low)                       | 3.00       | 0.002  |
| Nighttime sleep duration (hours)                 | 0.75       | 0.115  |
| Maternal depressive symptoms (CES-D total score) | 1.05       | <0.001 |
| Sleep terrors (average frequency)                | 2.12       | 0.065  |

*Note.* Frequency of sleep terrors is measured at 12, 18, 24, and 36 months. Socioeconomic status is measured at 12 months. Maternal depressive symptoms and nighttime sleep duration are measured at 48 and 60 months.

**Table S2. Associations between Frequency of Sleep Terrors in Early Childhood and Borderline-Clinical Degree of Internalizing Problems in Preschool (T-score of 60 and above)**

| Factors (unit or reference)                      | Odd ratio | p            |
|--------------------------------------------------|-----------|--------------|
| Child's sex (male)                               | 0.94      | 0.838        |
| Time (months)                                    | 1.08      | 0.670        |
| Socioeconomic status (low)                       | 1.77      | 0.071        |
| Nighttime sleep duration (hours)                 | 0.84      | 0.178        |
| Maternal depressive symptoms (CES-D total score) | 1.05      | <0.001       |
| Sleep terrors (average frequency)                | 2.64      | <b>0.014</b> |

*Note.* Frequency of sleep terrors is measured at 12, 18, 24, and 36 months. Socioeconomic status is measured at 12 months. Maternal depressive symptoms and nighttime sleep duration are measured at 48 and 60 months.
